# Supplementary material for: Size effect of Co–N–C-functionalized mesoporous silica hollow nanoreactors on the catalytic performance for the selective oxidation of ethylbenzene
Source: Royal Society of Chemistry journal article supplement (doi:10.1039/d2nj01705a), 2022-01-01
Supplement: d2nj01705a1.pdf [file d2nj01705a1.pdf]

## Supporting information

### The size effect of Co–N–C functionalized mesoporous silica hollow nanoreactors on the catalytic performance for selective oxidation of ethylbenzene

Chengfeng Yi <sup>a</sup>, Lushuang Zhang <sup>a</sup>, Ganghua Xiang <sup>a</sup>, Zhigang Liu<sup>\*a</sup>

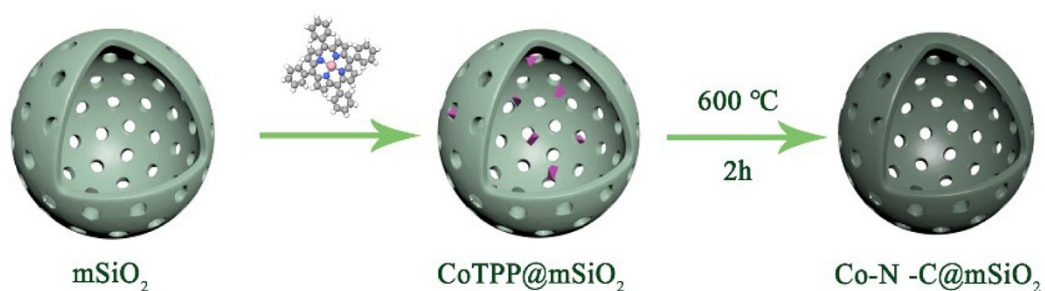

Fig. S1 Schematic illustration of the synthesis of Co–N–C@mSiO<sub>2</sub> nanoreactor based on mesoporous silica hollow sphere.

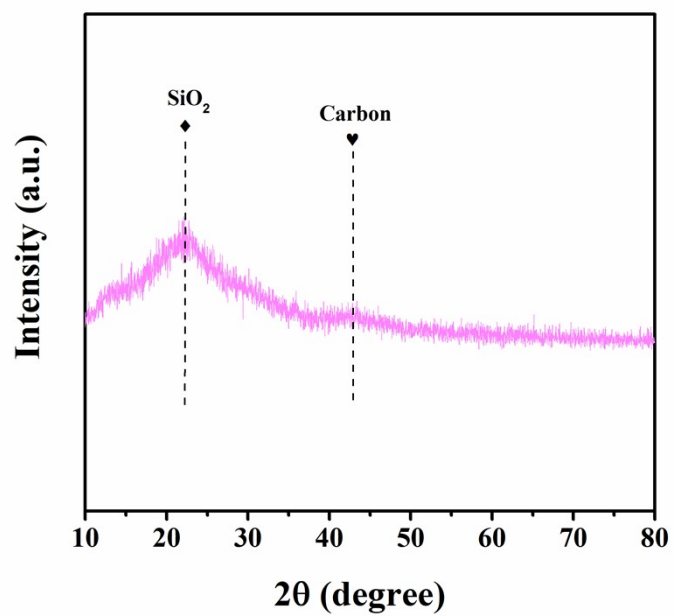

Fig. S2 The XRD pattern of Co-N-C@mSiO<sub>2</sub>-1-R<sub>6</sub>.

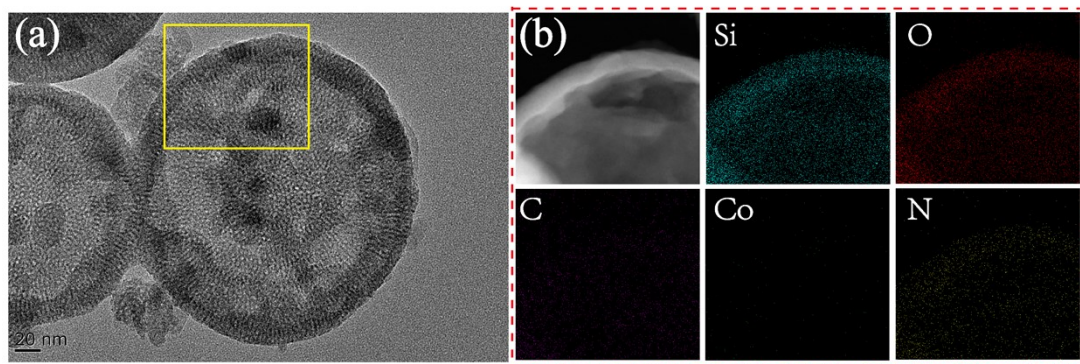

Fig. S3 The TEM image of Co-N-C@mSiO<sub>2</sub>-1-R<sub>6</sub> and corresponding EDS element distribution map.
